# Supplementary material for: DNA Display Selection of Peptide Ligands for a Full-Length Human G Protein-Coupled Receptor on CHO-K1 Cells
Source: PubMed Central journal article supplement (PMC3254644; doi:10.1371/journal.pone.0030084), 2012-01-10

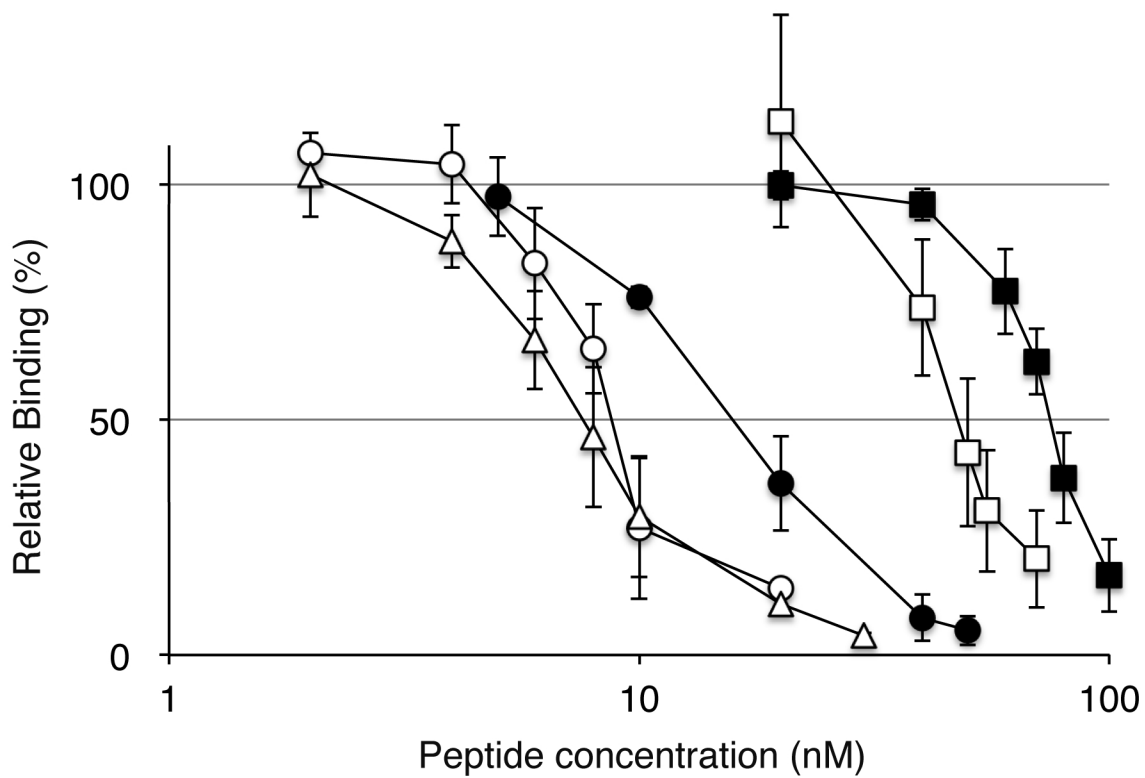

Supplement: pone.0030084.s001.pdf [file pone.0030084.s001.pdf]
